# Supplementary material for: A large-scale pico-droplet array for viable bacteria digital counting and dynamic tracking based on a thermosetting oil
Source: Royal Society of Chemistry journal article supplement (doi:10.1039/d2an00680d), 2022-01-01
Supplement: d2an00680d1.pdf [file d2an00680d1.pdf]

Table S1. Percentages of droplets (~60 pL) with 0, 1 or 2 cells.

Figure S1. The process flow of chip fabrication.

Figure S2. (A) Diagram of the chip design. This chip contains three units, including (B) flow focusing droplet generator, (C) droplet splitting region, and droplet accommodation chamber. The channel depth is 50  $\mu\text{m}$ . Pillar array was designed to support the large accommodation chamber. Scale bar is 150  $\mu\text{m}$ .
